# Supplementary material
Source: ML conference proceedings conference paper supplement (https://proceedings.mlr.press/v80/jiao18a.html)
Supplement: Supplementary file [file jiao18a-supp.pdf]

---

# Supplements to “The Weighted Kendall and High-order Kernels for Permutations” (ICML 2018)

---

Yunlong Jiao<sup>1</sup> Jean-Philippe Vert<sup>2</sup>

## Abstract

This is the supplements to the paper “The Weighted Kendall and High-order Kernels for Permutations” (ICML 2018).

### 1. Proofs of theorems

*Proof of Theorem 2.* The proof is constructive and the algorithm is summarized in Algorithm 1. C++/R implementation available in the package kernrank at <https://github.com/YunlongJiao/kernrank>.

The algorithm can be decomposed into three parts. First, we compute  $\pi := \sigma' \sigma^{-1}$  by carrying out the inverse and composition of permutations, which can be done in linear time (Line 1). Due to the right-invariance of any concerning kernel, we have  $K(\sigma, \sigma') = \kappa(\pi)$  where  $\kappa$  is the corresponding p.d. function:

$$\begin{aligned} \kappa_U^{\text{@}k}(\pi) &= \sum_{1 \leq i < j \leq n} \mathbb{1}_{i \leq k} \mathbb{1}_{j \leq k} \mathbb{1}_{\pi(i) \leq k} \mathbb{1}_{\pi(j) \leq k} \mathbb{1}_{\pi(i) < \pi(j)}, \\ \kappa_U^{\text{add}}(\pi) &= \sum_{1 \leq i < j \leq n} (u_i + u_j) (u_{\pi(i)} + u_{\pi(j)}) \mathbb{1}_{\pi(i) < \pi(j)}, \\ \kappa_U^{\text{mult}}(\pi) &= \sum_{1 \leq i < j \leq n} u_i u_j u_{\pi(i)} u_{\pi(j)} \mathbb{1}_{\pi(i) < \pi(j)}, \\ \kappa_W^{\text{avg}}(\pi) &= \sum_{1 \leq i < j \leq n} \frac{1}{n} \min\{i, \pi(i)\} \mathbb{1}_{\pi(i) < \pi(j)}. \end{aligned}$$

Second, we register a global variable  $s$  to record  $\kappa(\pi)$  (Line 2) and implement  $\kappa(\pi)$  in the function QUICKKAPPA (Lines 3–36). Finally,  $s$  is updated by calling the function QUICKKAPPA (Line 37) and then outputted by the algorithm.

---

<sup>1</sup>University of Oxford, Oxford, UK <sup>2</sup>MINES ParisTech & Institut Curie & Ecole Normale Supérieure, PSL Research University, Paris, France. Correspondence to: Jean-Philippe Vert <jean-philippe.vert@mines-paristech.fr>.

---

**Algorithm 1** Top- $k$ , average and weighted Kendall kernel with additive or multiplicative weight

---

**input** permutations  $\sigma, \sigma'$ , size  $n$ ,  $u$  for weighted Kendall kernel (optional),  $k$  for top- $k$  Kendall kernel (optional)

- 1:  $\pi := \sigma' \sigma^{-1}$
- 2: Initialize a global variable  $s := 0$  then define
- 3: **function** QUICKKAPPA(*indices*)
- 4:   **if** length of *indices* > 1 **then**
- 5:     *pivot* := pick any element from *indices*
- 6:     *indhight*, *indlow* := two empty arrays
- 7:     *cnum*, *ctop*, *cmin*, *cwa*, *cwb*, *cww* := 0
- 8:     **for each**  $i$  **in** *indices* **do**
- 9:       **if**  $\pi(i) < \pi(\textit{pivot})$  **then**
- 10:          Add  $i$  to *indlow*
- 11:          *cnum* += 1
- 12:          *cmin* +=  $\min\{i, \pi(i)\}/n$
- 13:          *ctop* += **if**  $i \leq k$  **and**  $\pi(i) \leq k$  **then** 1 **else** 0
- 14:          *cwa* +=  $u_i$
- 15:          *cwb* +=  $u_{\pi(i)}$
- 16:          *cww* +=  $u_i * u_{\pi(i)}$
- 17:       **else**
- 18:          Add  $i$  to *indhight*
- 19:       **switch** type of weighted Kendall kernel **do**
- 20:         **case** STANDARD:
- 21:          *s* += *cnum*
- 22:         **case** TOP- $k$ :
- 23:          *s* += **if**  $i \leq k$  **and**  $\pi(i) \leq k$  **then** *ctop* **else** 0
- 24:         **case** AVERAGE:
- 25:          *s* += *cmin*
- 26:         **case** ADDITIVE WEIGHT:
- 27:          *s* +=  $cww + cwa * u_{\pi(i)} + cwb * u_i + cnum * u_i * u_{\pi(i)}$
- 28:         **case** MULTIPLICATIVE WEIGHT:
- 29:          *s* +=  $cww * u_i * u_{\pi(i)}$
- 30:        **end switch**
- 31:     **end if**
- 32:   **end for**
- 33:   QUICKKAPPA(*indhight*)
- 34:   QUICKKAPPA(*indlow*)
- 35:   **end if**
- 36: **end function**
- 37: Call QUICKKAPPA( $[1, n]$ ) to update  $s$

**output**  $K(\sigma, \sigma') = s$

---

Central to the algorithm is the computation of  $\kappa(\pi)$ . It is based on an idea similar to a quicksort algorithm, where we recursively partition an array into two sub-arrays consisting of greater or smaller values according to a *pivot*, and cumulatively count the contributions between pairs of items with one in each sub-array. Specifically, suppose now  $\pi$  is divided into two sub-arrays  $\pi_{indhigh}$  and  $\pi_{indlow}$  where ranks in  $\pi_{indhigh}$  are all higher and those in  $\pi_{indlow}$ , now  $\kappa(\pi)$  can be decomposed into

$$\kappa(\pi) = \kappa(\pi_{indhigh}) + \kappa(\pi_{indlow}) + c(\pi_{indhigh}, \pi_{indlow}),$$

where  $c$  characterizes the weighted non-inversion number of  $\pi$  restricted on pairs of items with one in each sub-array. The computation of  $c(\pi_{indhigh}, \pi_{indlow})$  depends on specific choice of weight and is depicted in the pseudo-code (Lines 19–30). Notably a single linear-time pass over  $\pi$  is sufficient to compute  $c(\pi_{indhigh}, \pi_{indlow})$ . By the analysis of deduction typically for a quicksort algorithm, the overall time complexity of our algorithm is on average  $O(n \ln(n))$ .

In particular, recall that the standard Kendall kernel is merely a special case of the weighted Kendall kernel with constant weight, and hence our algorithm provides an alternative to the efficient algorithm based on merge sort proposed by Knight (1966).  $\square$

## References

Knight, W. R. A computer method for calculating Kendall’s tau with ungrouped data. *Journal of the American Statistical Association*, 61(314):436–439, 1966.
